# Supplementary material for: Ultralight and highly flexible aerogels with long cellulose I nanofibers
Source: Royal Society of Chemistry journal article supplement (doi:10.1039/c1sm06179h), 2011-01-01
Supplement: c1sm06179h.pdf [file c1sm06179h.pdf]

## Supporting Information

### Ultralight and Highly Flexible Aerogels with Long Cellulose I Nanofibers

Wenshuai Chen<sup>b</sup>, Haipeng Yu<sup>a,b,\*</sup>, Qing Li<sup>b</sup>, Yixing Liu<sup>a,b</sup> and Jian Li<sup>a,b</sup>

<sup>a</sup> Key laboratory of Bio-based Material Science and Technology of Ministry of Education,  
Northeast Forestry University, China

<sup>b</sup> Material Science and Engineering College, Northeast Forestry University, China

E-mail: [yuhaipeng20000@yahoo.com.cn](mailto:yuhaipeng20000@yahoo.com.cn).

**Table 1** Porosity of the aerogels obtained from hydrogels with different solid content.

| Aerogels     | aerogel-01 | aerogel-02 | aerogel-05 | aerogel-08 | aerogel-10 | aerogel-15 |
|--------------|------------|------------|------------|------------|------------|------------|
| Porosity (%) | 99.91      | 99.86      | 99.69      | 99.37      | 99.17      | 98.94      |

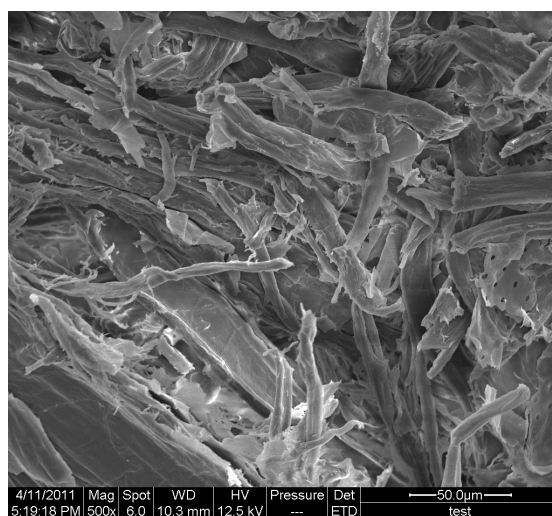

**Fig. S1** SEM image of the chemically purified cellulose fibers.

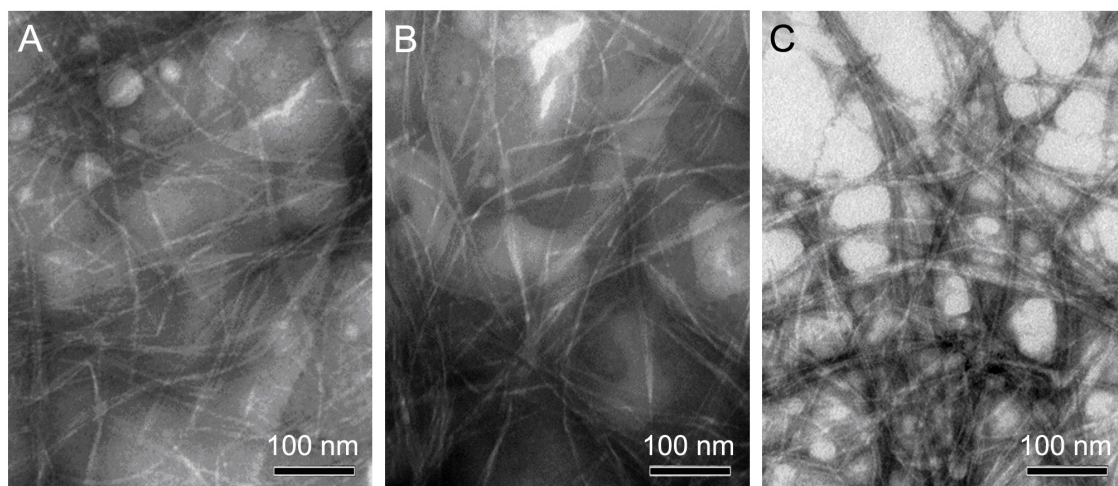

**Fig. S2** TEM images of (A) hydrogel-02, (B) hydrogel-08 and (C) hydrogel-15.

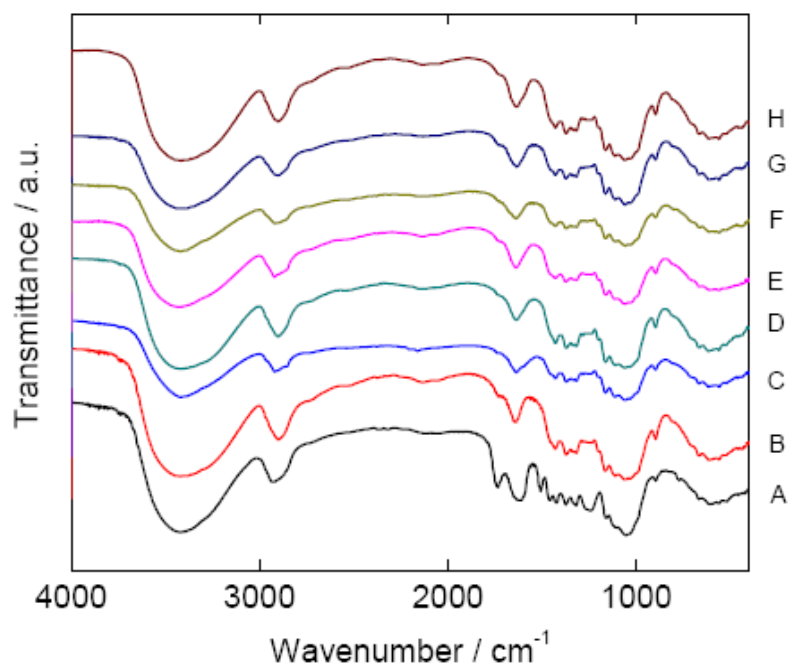

**Fig. S3** FT-IR spectra of (A) raw wood fibers, (B) chemically purified cellulose fibers, (C) hydrogel-01, (D) hydrogel-02, (E) hydrogel-05, (F) hydrogel-08, (G) hydrogel-10 and (H) hydrogel-15.

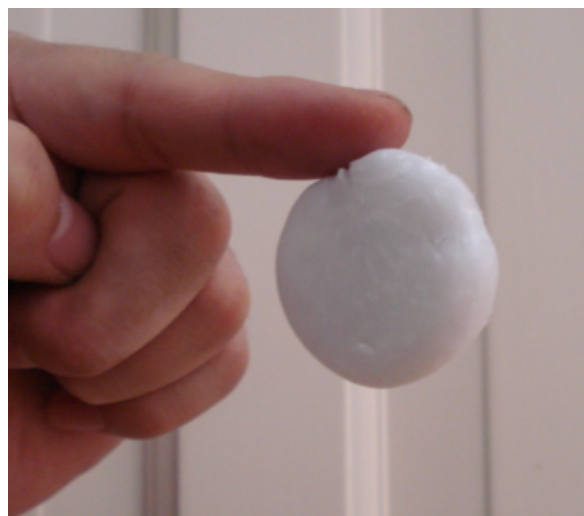

**Fig. S4** Photograph of aerogel-02. Due to the extremely low density of the aerogel, electrostatic charge is sufficient to make the sample stick to a finger in a way seemingly defying gravity.

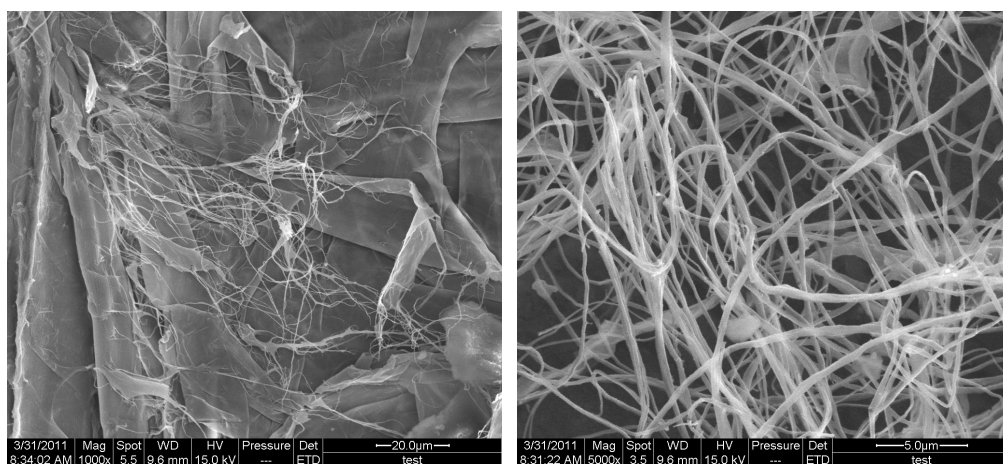

**Fig. S5** SEM images showing that some long nanofibers with uniform width 30-150 nm were still existed in aerogel-05.

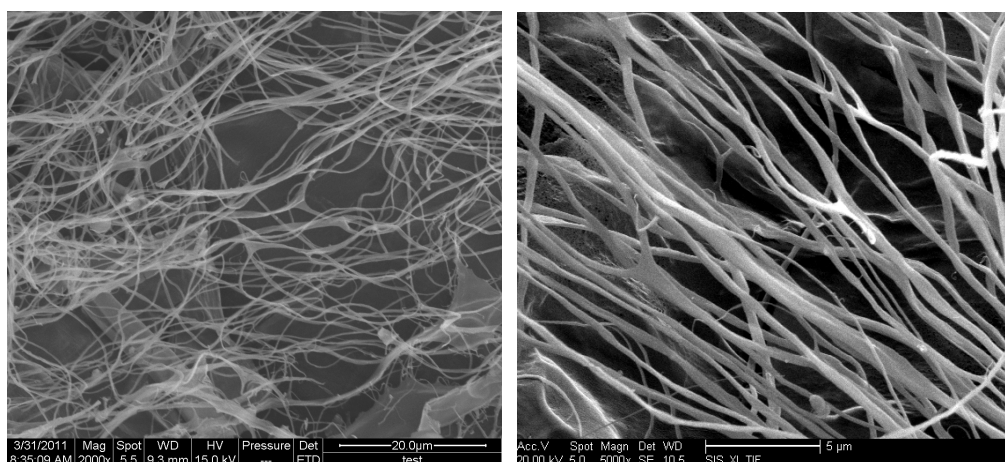

**Fig. S6** SEM images showing that some long nanofibers with uniform width 30-150 nm were still existed in aerogel-08.

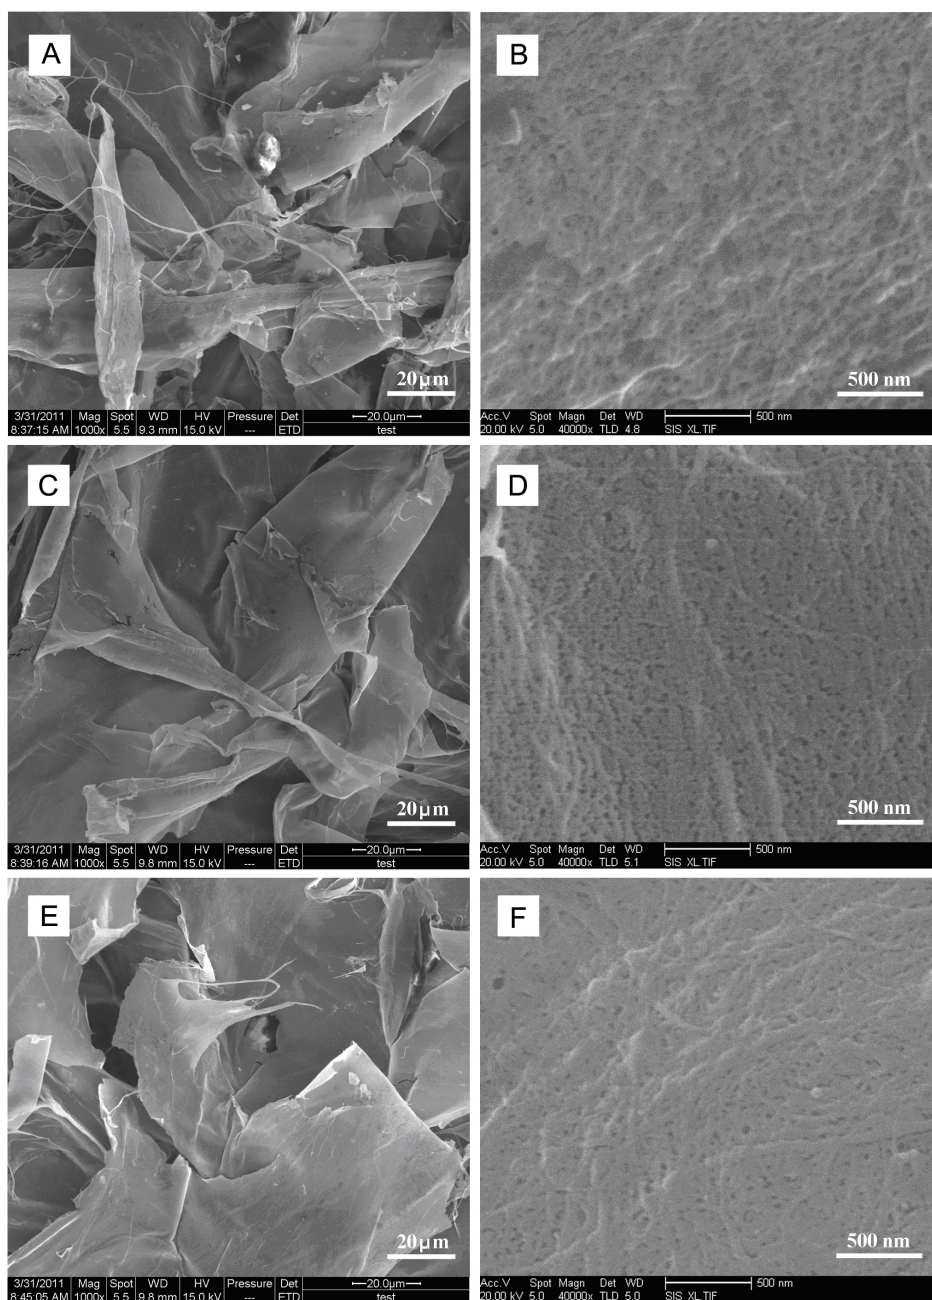

**Fig. S7** SEM images of aerogel-08 (A, B), aerogel-10 (C, D) and aerogel-15 (E, F). (A,C,E) Low-magnification ( $\times 1000$ ) and (B,D,F) high-magnification ( $\times 40000$ ) images of the aerogels.



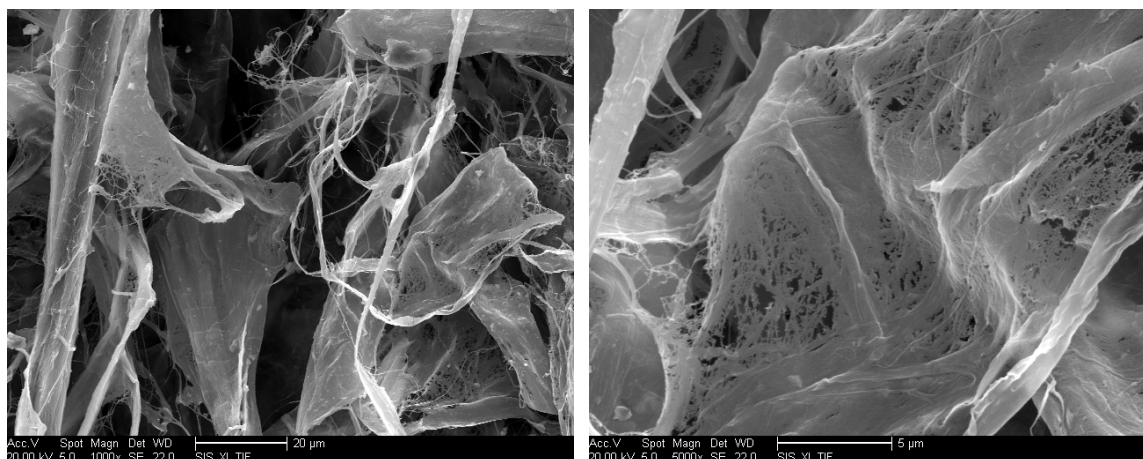

**Fig. S8** SEM images showing large sheet-like aggregates in the aerogels obtained by freeze-drying the  $\sim 0.018\%$  CNF content suspensions prepared by diluting the hydrogel-02.

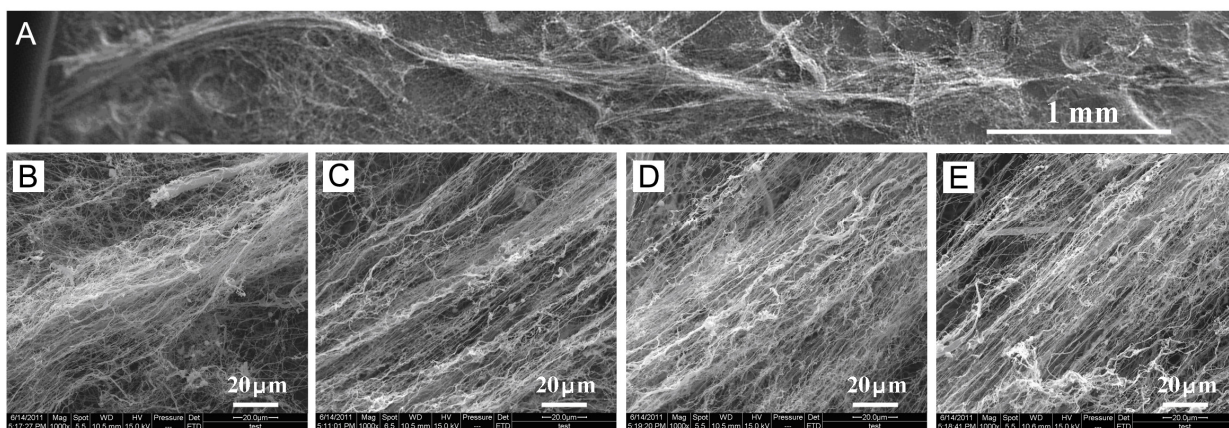

**Fig. S9** SEM images of the ultralong cellulose nanofibers. (A) low-magnification SEM image showing that the length of the nanofibers is exceeding 6 mm. (B to E) SEM images taken from four different segments of the ultralong cellulose nanofibers in (A), showing the uniformity in width along the entire length.
